# Supplementary material for: A label-free fluorescent sensor for rapid and sensitive detection of ctDNA based on fluorescent PDA nanoparticles
Source: Royal Society of Chemistry journal article supplement (doi:10.1039/d3an01169k), 2023-01-01
Supplement: d3an01169k1.pdf [file d3an01169k1.pdf]

## Supporting Information

### Label-free fluorescence sensor for rapid and sensitive detection of ctDNA based on fluorescent PDA nanoparticles

Xiao Yang,<sup>a</sup> Yang Huang,<sup>a</sup> Siyi Yang,<sup>a</sup> Miao Tang,<sup>a</sup> Juan Liu,<sup>a</sup> Jinhui Shen,<sup>a</sup> Huanbao Fa,<sup>c</sup>

Danqun Huo,<sup>a,b</sup> Changjun Hou,<sup>a,b,\*</sup> Mei Yang<sup>a,b,\*</sup>

<sup>a</sup> Key Laboratory of Biorheological Science and Technology, Ministry of Education, College of Bioengineering, Chongqing University, Chongqing 400044, PR China

<sup>b</sup> College of Bioengineering, Chongqing University, Chongqing 400044, PR China

<sup>c</sup> College of Chemistry and Chemical Engineering, Chongqing University, Chongqing 400044, PR China

\* Corresponding authors.

E-mail addresses: houcj@cqu.edu.cn (C.J. Hou); yangmei@cqu.edu.cn (M. Yang).

Tel: +86 23 6511 2673; Fax: +86 23 6510 2507

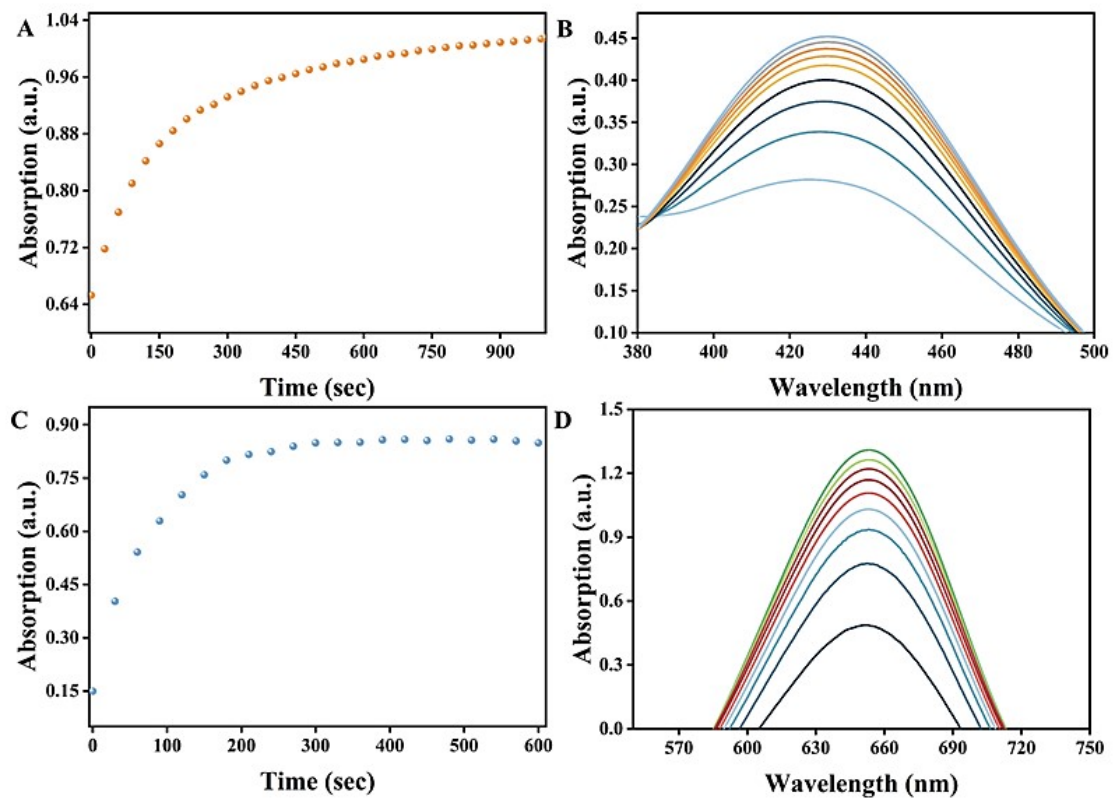

Fig. S1(A) The reaction dynamics of OPD after adding  $MnO_2$ ; (B) The UV-Vis absorption of  $MnO_2 + OPD$ ; (C) The reaction dynamics of TMB after adding  $MnO_2$ ; (D) The UV-Vis absorption of  $MnO_2 + TMB$ .
